# Supplementary material for: Towards a long-term stable MAPbBr3 single crystal-based photoconductor with a high on/off ratio and detectivity
Source: Royal Society of Chemistry journal article supplement (doi:10.1039/d4cc06152g), 2025-01-01
Supplement: d4cc06152g1.pdf [file d4cc06152g1.pdf]

## Supplementary Information

### Towards long-term stable MAPbBr<sub>3</sub> single crystal-based photoconductor with a high on/off ratio and detectivity

Vishnu Anilkumar,<sup>a</sup> Apurba Mahapatra,<sup>a,\*</sup> Joanna Kruszyńska,<sup>a</sup> Manoranjan Mandal,<sup>b</sup> Seckin Akin,<sup>c</sup> Pankaj Yadav<sup>d</sup> and Daniel Prochowicz<sup>a,\*</sup>

<sup>a</sup> Institute of Physical Chemistry, Polish Academy of Sciences, Kasprzaka 44/52, 01-224 Warsaw, Poland

<sup>b</sup> Department of Physics, School of Science, GITAM University, Bengaluru, 561203, India

<sup>c</sup> Department of Metallurgical and Materials Engineering, Necmettin Erbakan University, Konya, 42090, Turkey

<sup>d</sup> Department of Solar Energy, School of Energy Technology, Pandit Deendayal Energy University, Gandhinagar-382 007, Gujarat, India

## 1. Experimental Section

### 1.1 Materials

Lead (II) bromide ( $\text{PbBr}_2$ ,  $\geq 98\%$ ), toluene (Anhydrous, 99.8 %), isopropyl alcohol (IPA, 99.9%), dimethyl formamide (DMF, anhydrous 99.8%), octylamine ( $\geq 99\%$ ) and Sulphuric acid were obtained from Sigma-Aldrich, methylammonium bromide (MABr,  $>99.99\%$ ) was obtained from Great Cell Solar Materials. All chemicals were used as received without any further purification.

**1.2 Growth and Characterization of  $\text{MAPbBr}_3$  SC:** 1.2 M  $\text{MAPbBr}_3$  solution was prepared by dissolving the equimolar amounts of  $\text{PbBr}_2$  and MABr in 5 mL anhydrous DMF and stirring the solution at room temperature until a clear solution was obtained. The resulting clear solution was then filtered using a 0.2  $\mu\text{m}$  PTFE filter. Subsequently, the solution was heated to  $80^\circ\text{C}$  and maintained at this temperature until large single crystals of  $\text{MAPbBr}_3$  were formed. The resulting crystals were then collected, dried, and stored for further experiments.

**1.3 Passivation process and characterization:** A 4 mM sulfate passivation solution is prepared by dissolving an equimolar amount of octylamine and sulfuric acid in an IPA:toluene (1:5) mixture. The solution is stirred for 30 minutes and left undisturbed for 24 hours to stabilise. Afterwards, the solution is filtered using a PTFE 0.2  $\mu\text{m}$  filter and then used for passivation. For the passivation process, the  $\text{MAPbBr}_3$  SCs are fully immersed in the solution for 10, 20, 30, and 40 seconds, respectively. The SCs retrieved from the solution are washed with toluene, dried, and stored.

**1.4 Fabrication and Characterizations of SC-based PDs:** 100 nm thick platinum (Pt) electrodes were deposited on the (100) facet of SCs with a self-designed mask of 150  $\mu\text{m}$  channel by using magnetron sputtering (Leica EM MED020). All current-voltage and PD response measurements were conducted using a Bio-Logic SP-150e potentiostat and a Semiconductor Analysis and Testing Solutions (SATs) probe station at a scan rate of  $100\text{ mV s}^{-1}$ . The power of the blue LED ( $\lambda = 448\text{ nm}$ , Luxeon Star LED) was optimised using Thorlabs GmbH., PM 100D and controlled by Bio-Logic SP-150e potentiostat.

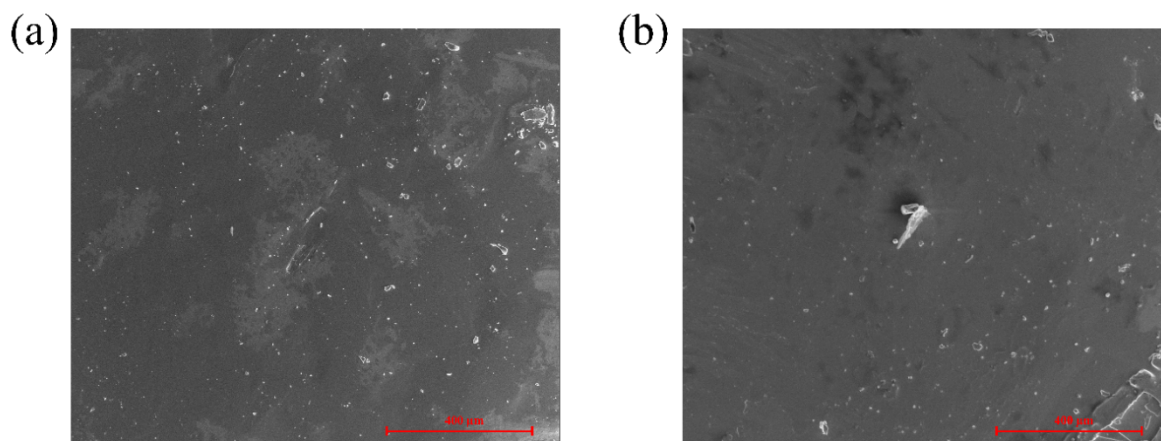

**Fig. S1** SEM images of MAPbBr<sub>3</sub> SC surface (a) before and (b) after passivation.

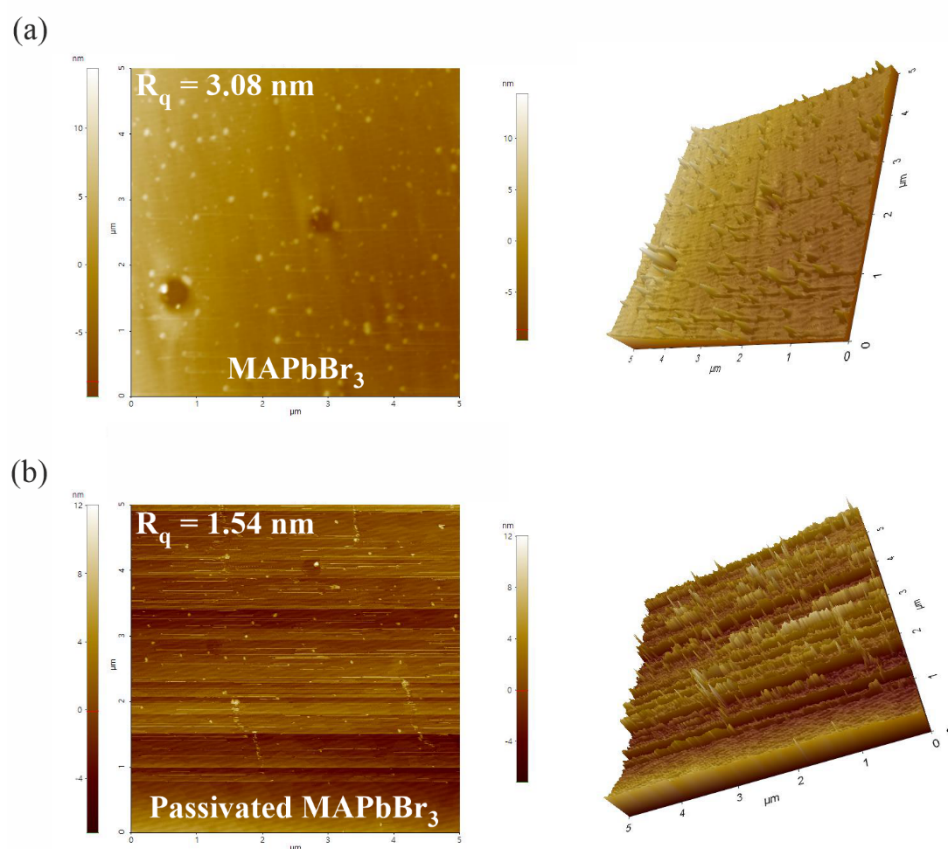

**Fig. S2** AFM images of MAPbBr<sub>3</sub> SC surface (a) before and (b) after passivation.

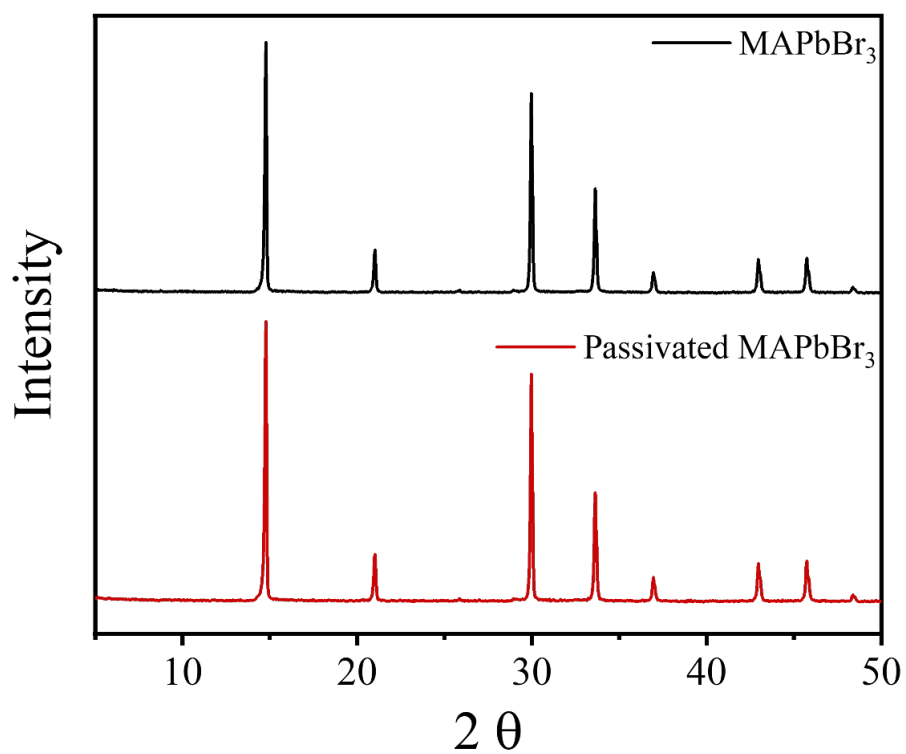

**Fig. S3** The pXRD pattern of the pristine and passivated MAPbBr<sub>3</sub>.

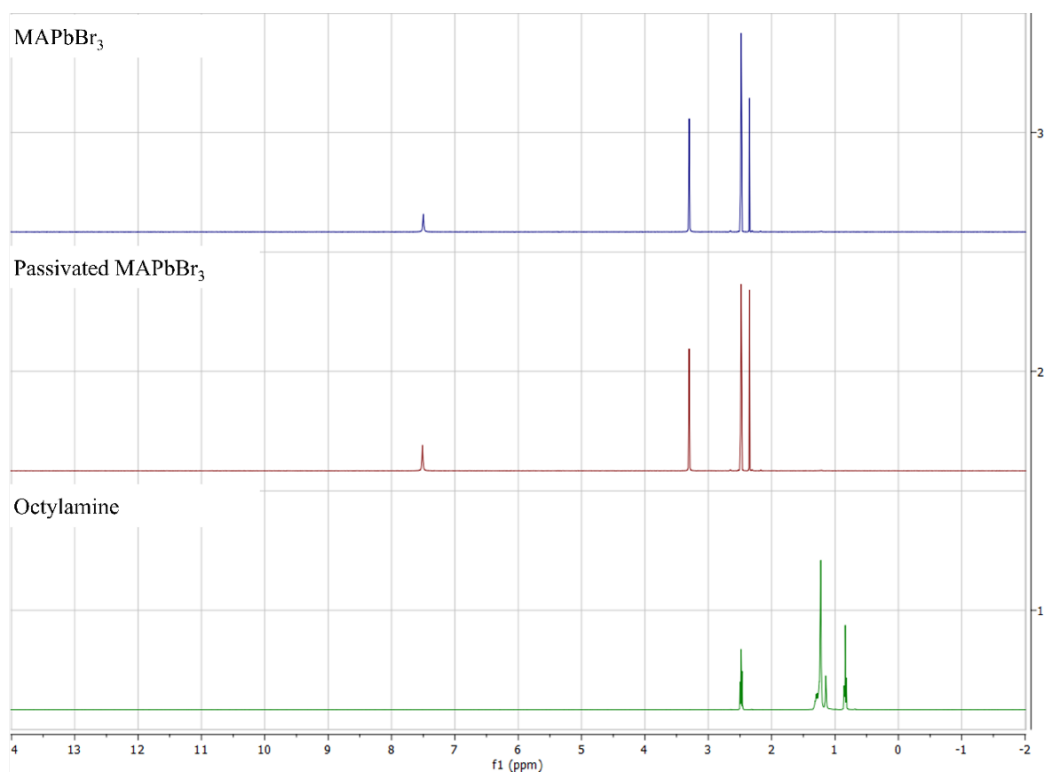

**Fig. S4** <sup>1</sup>H NMR of the MAPbBr<sub>3</sub>, passivated MAPbBr<sub>3</sub> and octylamine.

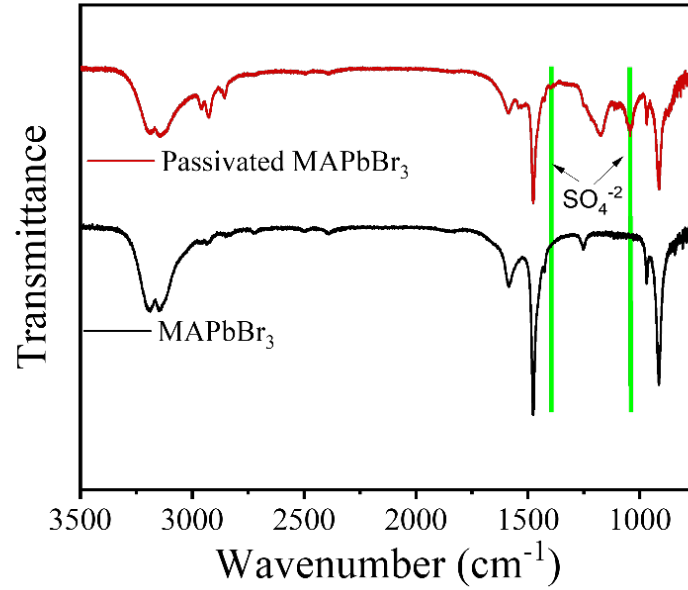

**Fig. S5** FT-IR spectra of pristine MAPbBr<sub>3</sub> and passivated MAPbBr<sub>3</sub> SCs. The formation of PbSO<sub>4</sub> on the surface was confirmed by Fourier transform infrared (FT-IR) transmission measurement, which is consistent with our previous work.<sup>1</sup> The FTIR of the passivated SC confirms the presence of the character peaks of SO<sub>4</sub><sup>2-</sup> (S=O stretching) at 1040 cm<sup>-1</sup> and 1398 cm<sup>-1</sup>.<sup>1</sup>

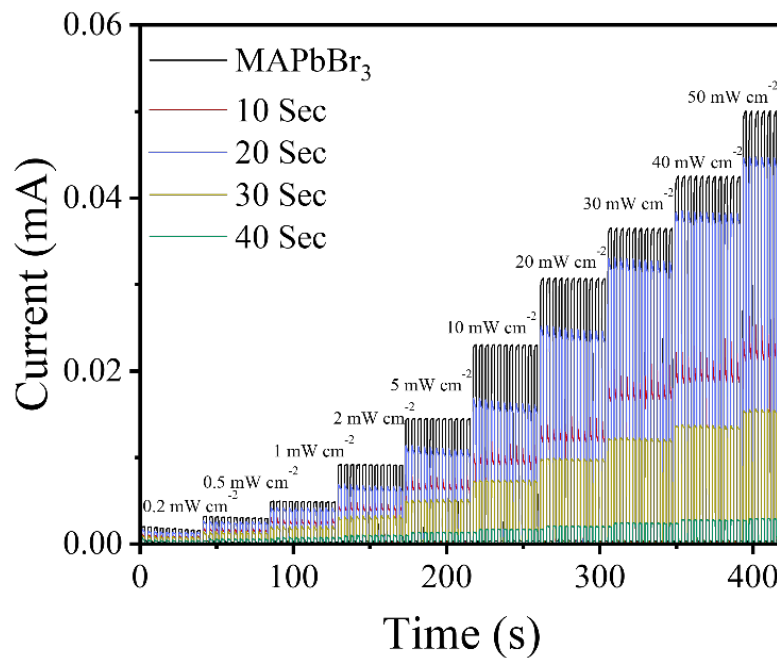

**Fig. S6** Intensity-dependent transient photoresponse of the pristine, and 10, 20, 30, 40 seconds passivated MAPbBr<sub>3</sub> SC-based PDs under blue LED ( $\lambda = 448$  nm) pulsed light at a fixed bias of 2 V.

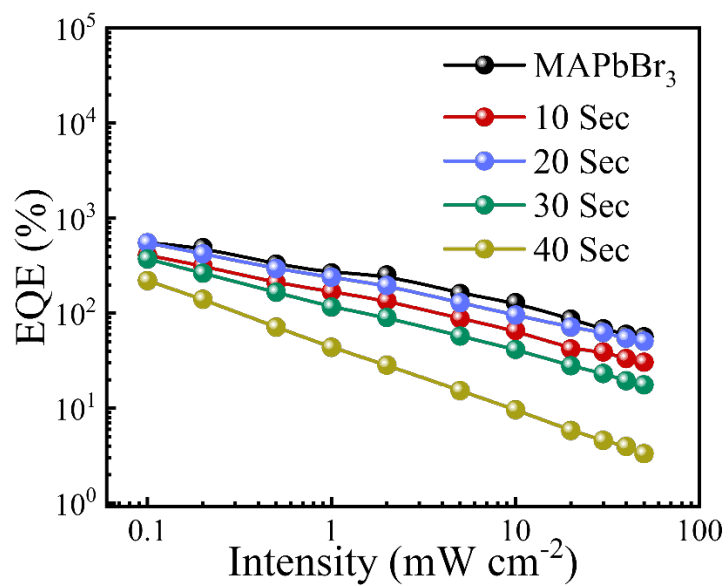

**Fig. S7** EQE of the control and passivated SC-based PDs under blue light (448 nm) and 2 V bias.

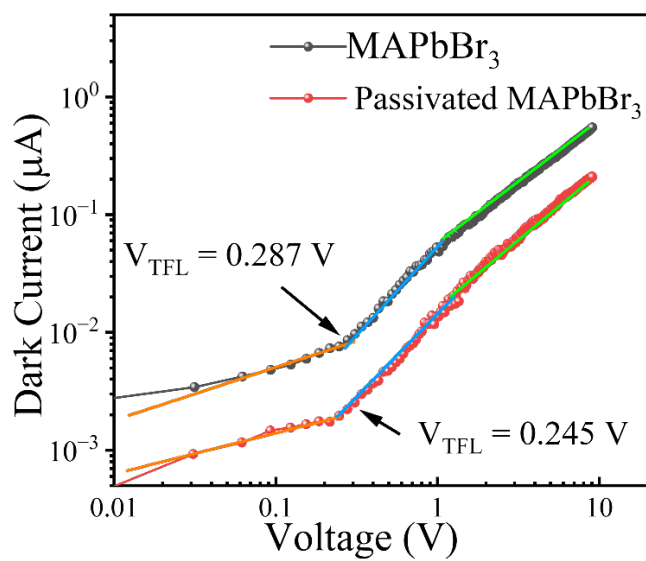

**Fig. S8** Dark I–V characteristics in the form of SCLC of the pristine and passivated MAPbBr<sub>3</sub> SC.

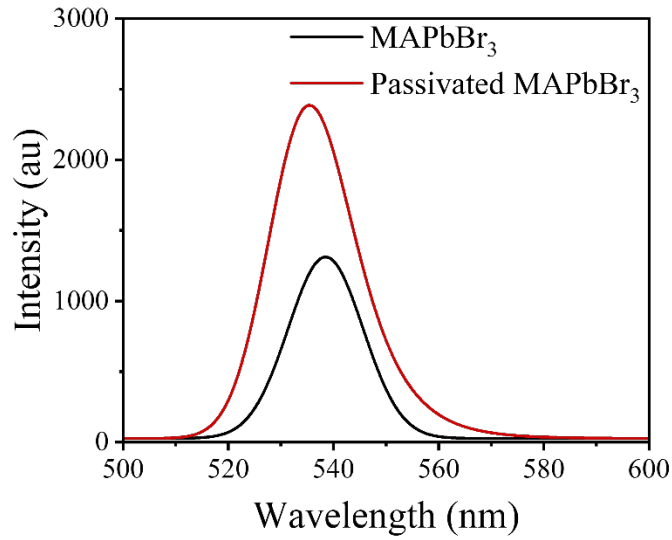

**Fig. S9** The PL of the pristine and passivated SC for the excitation of 405 nm wavelength.

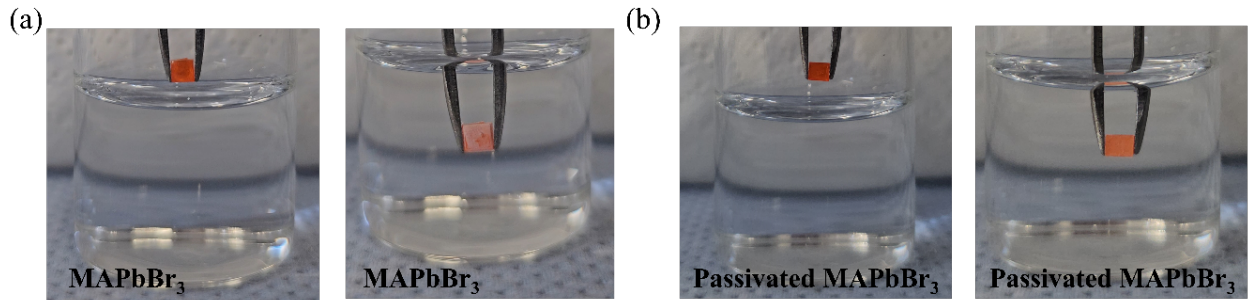

**Fig. S10** (a) Pristine and (b) passivated MAPbBr<sub>3</sub> SCs immersed in water for 3 seconds.

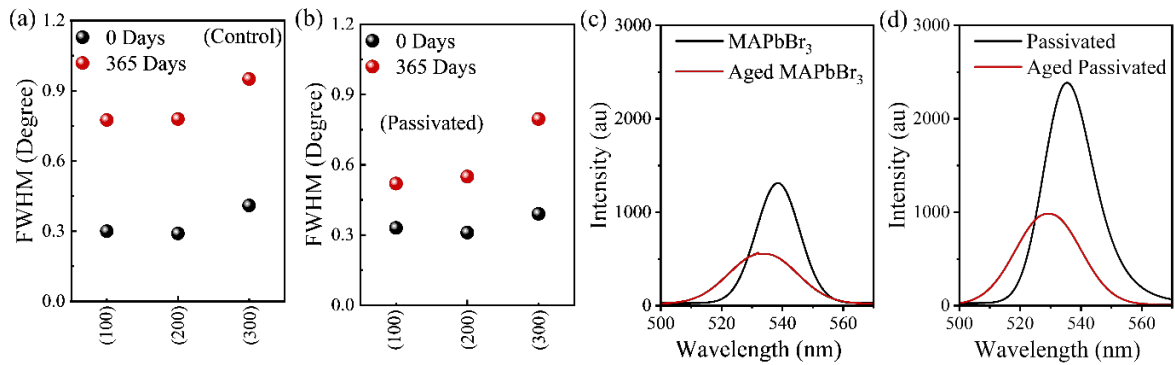

**Fig. S11** Analysis of FWHM for the XRD peaks of fresh and aged (a) Pristine and (b) passivated MAPbBr<sub>3</sub> SCs. The evolution of PL spectra of (a) Pristine and (b) passivated MAPbBr<sub>3</sub> SCs over time.

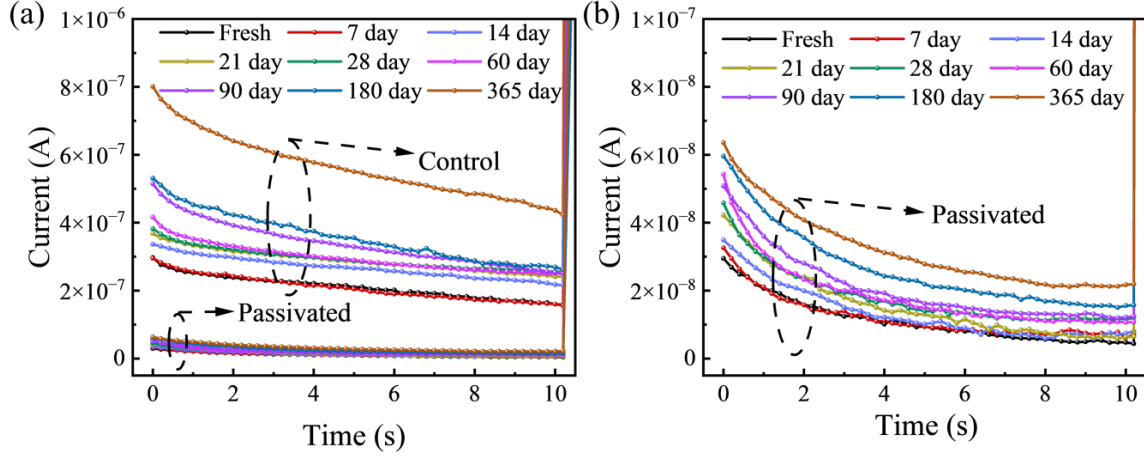

**Fig. S12** Dark current of the (a) control and (b) 20 s dipped MAPbBr<sub>3</sub> SC-based PDs over aging time.

**Supplementary Note 1**

The responsivity (R) and external quantum efficiency (EQE) of the control and passivated SC-based PDs were calculated using Eqn. (S1) and (S2),<sup>2</sup>

$$Responsivity (R) = \frac{I_{light} - I_{dark}}{P \times A} \quad \text{----- (Eqn. S1)}$$

Where  $I_{light}$  is photocurrent,  $I_{dark}$  is dark current, P is the illumination power, and A is the active area.

$$External\ quantum\ efficiency\ (EQE) = \frac{R \times h \times c}{\lambda \times e} \quad \text{----- (Eqn. S2)}$$

where h is the plank’s constant,  $\lambda$  is the illumination wavelength, and e is the elemental charge of the electron.

The responsivity Specific detectivity ( $D^*$ ) and on-off ratio of PDs are calculated as,<sup>2</sup>

$$Specific\ detectivity\ (D^*) = R \sqrt{\frac{A}{2 \times e \times I_{dark}}} \quad \text{----- (Eqn. S3)}$$

$$on - off\ ratio = \frac{I_{light}}{I_{dark}} \quad \text{----- (Eqn. S4)}$$

The trap density ( $\eta_{trap}$ ) of these SCs was calculated using the space charge-limited current (SCLC) method as,<sup>3</sup>

$$\eta_{traps} = \frac{2 \epsilon_0 \epsilon_r V_{TFL}}{eL^2} \quad \text{----- (Eqn. S5)}$$

where  $\epsilon_0$  and  $\epsilon_r$  are the dielectric constants of the vacuum permeability and the dielectric constant, and L is the thickness of the crystal.



The dark current ( $J_d$ ) increasing rate is calculated using Eqn. (S6)<sup>4</sup>

$$Rate = \left( \frac{(J_a - J_b)/(a - b)}{J_b} \right) \times 100\% \quad \text{----- (Eqn. S6)}$$

Where, the  $J_a$  and  $J_b$  are the dark current densities of the days a and b.

**Table S1.** The comparison of PD parameters for MAPbBr<sub>3</sub> SC-based photoconductor with symmetric electrode reported in the literature and our work.

| PD structure                         | Wavelength (nm) | Light Intensity           | Bias (V) | Distance between electrodes | R (A/W)                | EQE (%) / Gains        | D (Jones)              | Ref |
|--------------------------------------|-----------------|---------------------------|----------|-----------------------------|------------------------|------------------------|------------------------|-----|
| Au/ MAPbBr <sub>3</sub> /Au          | 405             | 10 μW                     | 9.84     | 100 μm                      | 0.015 (100)            | 0.046                  |                        | 5   |
|                                      |                 |                           |          |                             | 0.038 (110)            | 0.113                  |                        |     |
| Au/ MAPbBr <sub>3</sub> /Au          | 576             | 1 W m <sup>-2</sup>       | 2        | 125 μm                      | 0.6                    | 124                    | 4 × 10 <sup>11</sup>   | 6   |
|                                      |                 |                           |          | 100 μm                      | 0.7                    | 151                    | 2.5 × 10 <sup>11</sup> |     |
|                                      |                 |                           |          | 75 μm                       | 1.02                   | 221                    | 2.5 × 10 <sup>11</sup> |     |
|                                      |                 |                           |          | 50 μm                       | 1.31                   | 298                    | 2.2 × 10 <sup>11</sup> |     |
|                                      |                 |                           |          | 25 μm                       | 1.54                   | 332                    | 2.2 × 10 <sup>11</sup> |     |
|                                      |                 | 0.02 W m <sup>-2</sup>    |          | 125 μm                      | 2.3                    | 498                    | 1.4 × 10 <sup>12</sup> |     |
|                                      |                 |                           |          | 100 μm                      | 2.8                    | 607                    | 1 × 10 <sup>12</sup>   |     |
|                                      |                 |                           |          | 75 μm                       | 3.3                    | 705                    | 8 × 10 <sup>11</sup>   |     |
|                                      |                 |                           |          | 50 μm                       | 4.2                    | 900                    | 7.2 × 10 <sup>11</sup> |     |
|                                      |                 |                           |          | 25 μm                       | 5.3                    | 1130                   | 7.4 × 10 <sup>11</sup> |     |
| Au/Cr/ MAPbBr <sub>3</sub> / Cr/Au   | 525             | 0.012 mW cm <sup>-2</sup> | 4        |                             | 16                     | 3900                   | 6 × 10 <sup>13</sup>   | 7   |
| Au/ MAPbBr <sub>3</sub> (concave)/Au | 520             | 3.67 μW cm <sup>-2</sup>  | 3        |                             | 62.9                   | 1.50 × 10 <sup>4</sup> | 6.5 × 10 <sup>12</sup> | 8   |
|                                      |                 | 12.02 μW cm <sup>-2</sup> |          |                             | 58.5                   | 1.4 × 10 <sup>4</sup>  |                        |     |
|                                      |                 | 35.4 mW cm <sup>-2</sup>  |          |                             | 5.43                   | 1300                   | 6.5 × 10 <sup>12</sup> |     |
| Au/MAPbBr <sub>3</sub> /Au           | 520             | 35.4 mW cm <sup>-2</sup>  | 3        |                             | 0.98                   | 234                    | 6.5 × 10 <sup>12</sup> |     |
| Au/MAPbBr <sub>3</sub> /Au           | 630             | 0.1 mW                    | 5        |                             | 1.7 × 10 <sup>-3</sup> | 0.22                   |                        | 9   |

|                                                      |     |                                      |          |               |             |                       |                              |                                |
|------------------------------------------------------|-----|--------------------------------------|----------|---------------|-------------|-----------------------|------------------------------|--------------------------------|
| Au/Cr/<br>MAPbBr <sub>3</sub> /<br>Cr/Au             | 515 | 10 <sup>-3</sup> mW cm <sup>-2</sup> | 5        |               | 55.7        | 13453                 | 8 × 10 <sup>13</sup>         | <b>10</b>                      |
|                                                      |     | 35 mW cm <sup>-2</sup>               |          |               | ≈ 0.1       | ≈ 40                  | ≈ 2.5 6.5 × 10 <sup>11</sup> |                                |
|                                                      |     | 0.1 mW cm <sup>-2</sup>              |          |               | ≈ 3         | ≈ 8 × 10 <sup>3</sup> | ≈ 5 × 10 <sup>12</sup>       |                                |
| Au/ MAPbBr <sub>3</sub><br>/Au                       | 448 | 0.1 mW cm <sup>-2</sup>              | 2        | 150 μm        | 0.41        | 112                   | 1.05 × 10 <sup>12</sup>      | <b>11</b>                      |
| Pt/ MAPbBr <sub>3</sub><br>/Pt                       |     |                                      |          |               | 1.99        | 553                   | 5.09 × 10 <sup>12</sup>      |                                |
| <b>Pt/<br/>passivated-<br/>MAPbBr<sub>3</sub>/Pt</b> | 448 | <b>0.1 mW cm<sup>-2</sup></b>        | <b>2</b> | <b>150 μm</b> | <b>1.99</b> | <b>552</b>            | <b>1.7 × 10<sup>13</sup></b> | <b>Thi<br/>s<br/>wo<br/>rk</b> |
| <b>Pt/ MAPbBr<sub>3</sub><br/>/Pt</b>                |     |                                      |          |               | <b>1.99</b> | <b>552</b>            | <b>4.9 × 10<sup>12</sup></b> |                                |

## References

- 1A. Mahapatra, N. Parikh, H. Kumari, M. K. Pandey, M. Kumar, D. Prochowicz, A. Kalam, M. M. Tavakoli and P. Yadav, *J. Appl. Phys.*, 2020, **127**, 185501.
- 2V. Anilkumar, A. Mahapatra, J. Nawrocki, R. D. Chavan, P. Yadav and D. Prochowicz, *Adv. Optical Mater.*, 2024, **12**, 2302032.
- 3A. Mahapatra, V. Anilkumar, J. Kruszyńska, N. Mrkyvkova, P. Siffalovic, P. Yadav and D. Prochowicz, *J. Mater. Chem. C*, 2024, **12**, 2953–2960.
- 4Y. Xu, X. Wang, J. Zhao, Y. Pan, Y. Li, E. E. Elemike, Q. Li, X. Zhang, J. Chen, Z. Zhao, J. Akram, B. S. Bae, S. Bin and W. Lei, *Front. Mater.*, 2021, **8**, 651957
- 5Z. Zuo, J. Ding, Y. Zhao, S. Du, Y. Li, X. Zhan and H. Cui, *J. Phys. Chem. Lett.*, 2017, **8**, 684–689.
- 6S. Gavranovic, J. Pospisil, O. Zmeskal, V. Novak, P. Vanysek, K. Castkova, J. Cihlar and M. Weiter, *ACS Appl. Mater. Interfaces*, 2022, **14**, 20159–20167.
- 7Y. Liu, Y. Zhang, K. Zhao, Z. Yang, J. Feng, X. Zhang, K. Wang, L. Meng, H. Ye, M. Liu and S. (Frank) Liu, *Adv. Mater.*, 2018, **30**, 1707314.
- 8H. Liu, X. Wei, Z. Zhang, X. Lei, W. Xu, L. Luo, H. Zeng, R. Lu and J. Liu, *J. Phys. Chem. Lett.*, 2019, **10**, 786–792.
- 9Z. Zhang, K. Chen, W. Xia and Z. Zuo, *Mater. Res. Express*, 2020, **7**, 125902.
- 10 Y. Liu, Y. Zhang, Z. Yang, J. Feng, Z. Xu, Q. Li, M. Hu, H. Ye, X. Zhang, M. Liu, K. Zhao, S. (Frank) Liu *Mater. Today*, 2019, **22**, 67–75.
- 11 A. Mahapatra, V. Anilkumar, R. D. Chavan, P. Yadav and D. Prochowicz, *ACS Photonics*, 2023, **10**, 1424–1433.
